# Supplementary material for: Two isomorphous Mn(ii) and Co(ii) 5-amino-tetrazolate coordination polymers with magnetic Δ-chains: crystal structures and magnetic properties
Source: Royal Society of Chemistry journal article supplement (doi:10.1039/c2dt12495e), 2012-01-01
Supplement: c2dt12495e.pdf [file c2dt12495e.pdf]

*Electric Supplementary Information:*

## Two Isomorphous Mn(II) and Co(II) 5-Amino-Tetrazolate Coordination Polymers with Magnetic $\Delta$ -Chain: Crystal Structures and Magnetic Properties

DongSheng Liu<sup>\*,†,‡</sup>, Yan Sui,<sup>†</sup> TianWei Wang<sup>§</sup>, ChangCang Huang<sup>\*,‡</sup>, JianZhong Chen,<sup>‡</sup> XiaoZeng You<sup>\*,§</sup>

<sup>†</sup> School of Chemistry & Chemical Engineering, Institute of Applied Chemistry, Jingtangshan University, Ji'an, Jiangxi 343009, P. R. China,

<sup>‡</sup> School of Chemistry & Chemical Engineering, Fuzhou University, Fuzhou, Fujian 350108, P. R. China,

<sup>§</sup> State Key Laboratory of Coordination Chemistry, School of Chemistry and Chemical Engineering, Nanjing University, Nanjing 210093, P. R. China

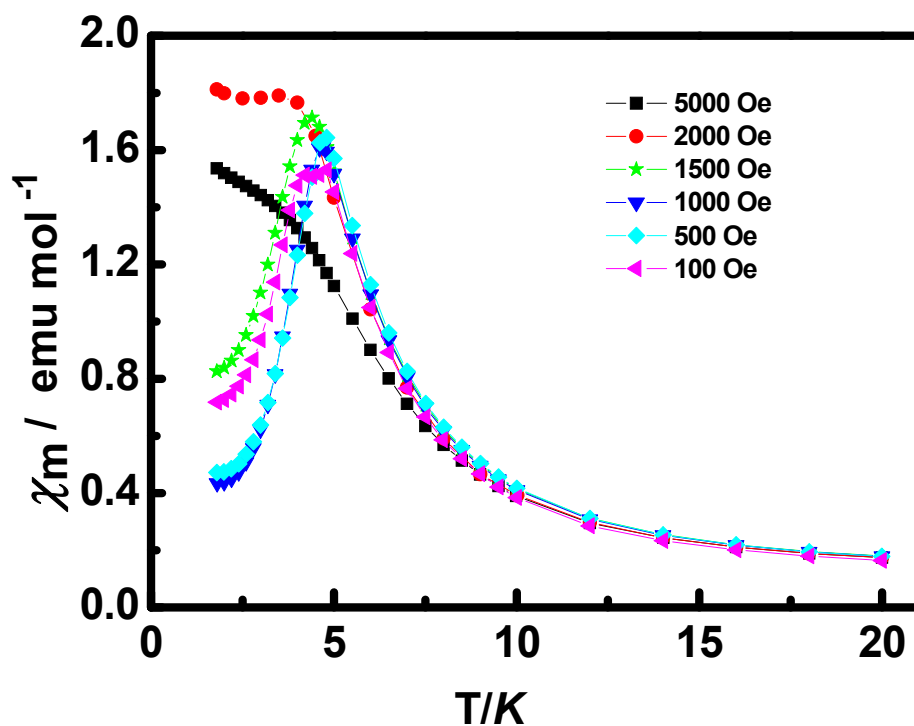

Fig. S1  $\chi_m$  vs.  $T$  plot at various fields in 1

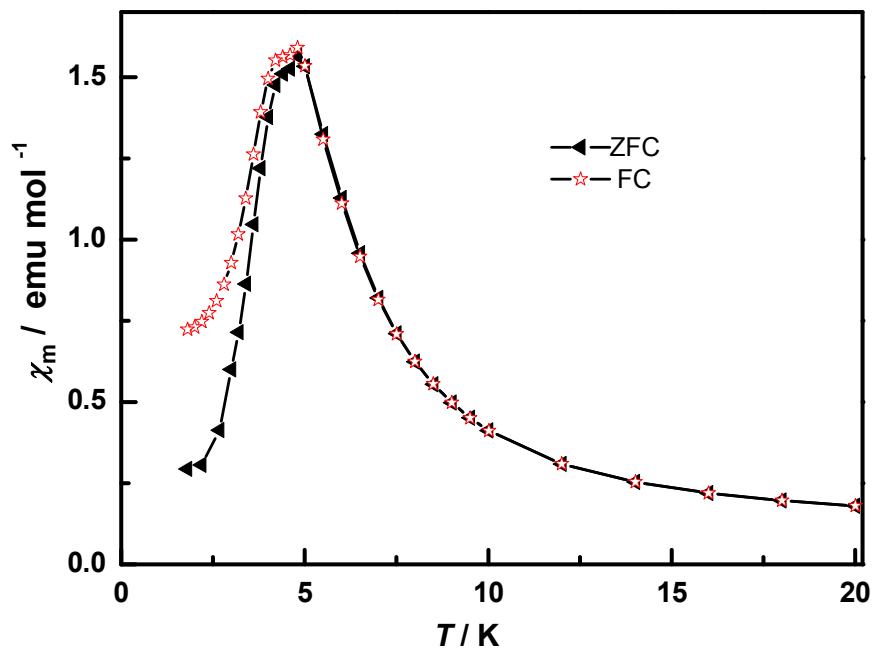

Fig. S2 FC and ZFC ( $H_{dc} = 100$  Oe) magnetization for 1.

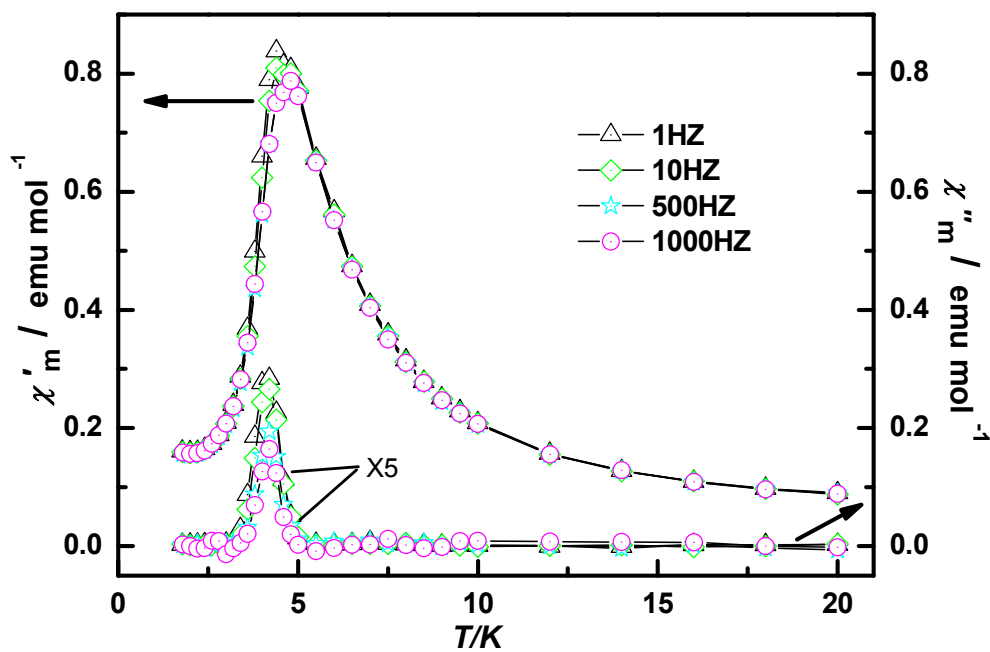

Fig. S3 Temperature dependence of ac susceptibility at various frequencies from 1.8 - 20 K. ( $H_{dc} = 0$  Oe,

$H_{ac} = 5$  Oe).

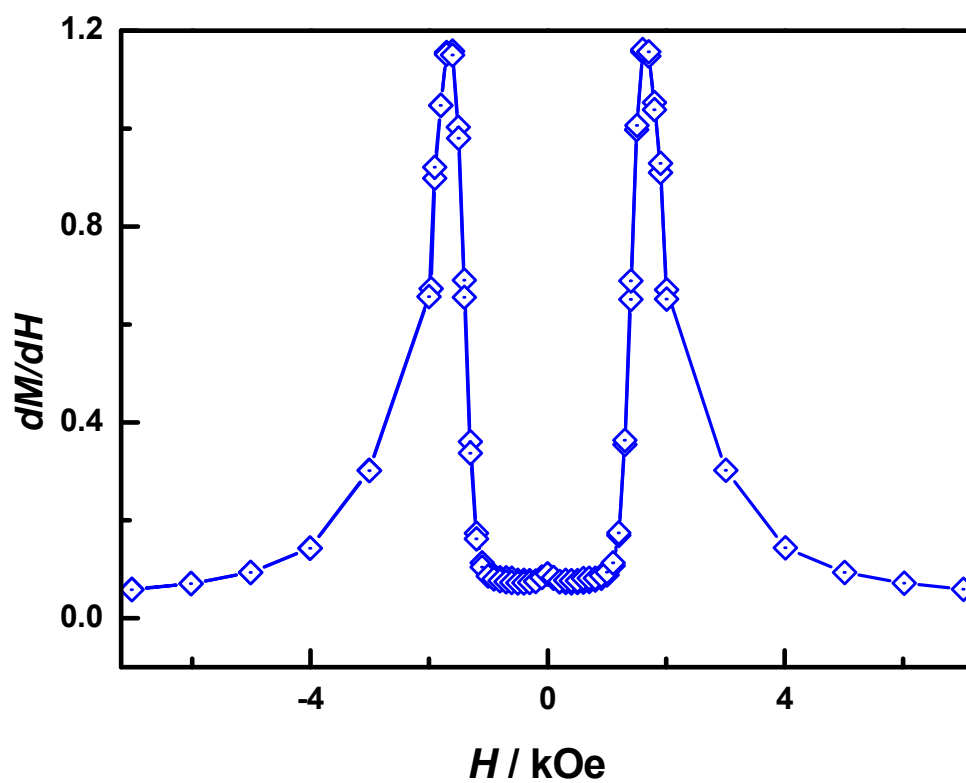

Fig. S4 Plot of  $dM/dH$  vs.  $H$  at 1.8 K showing  $H_c = 2$  kOe

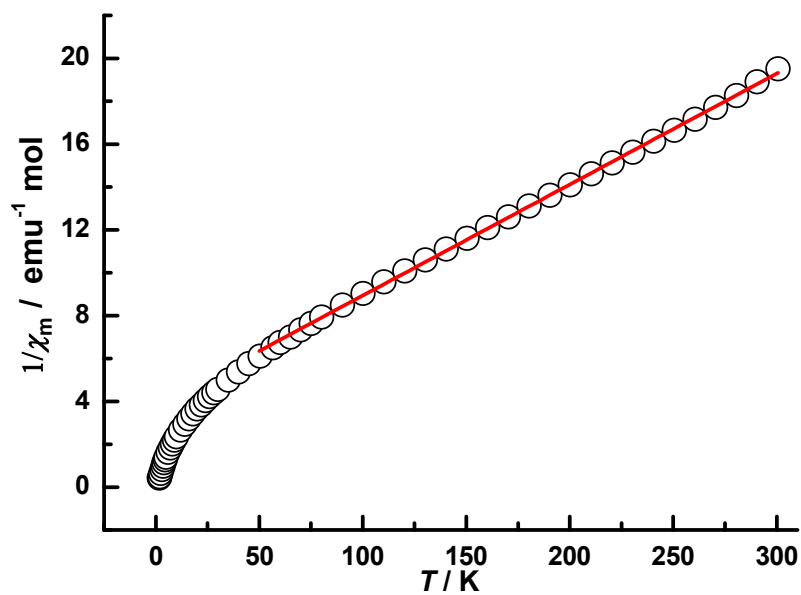

Fig. S5  $1/\chi_m$  vs  $T$  plot for 2 above 60 K is exactly linear following the Curie-Weiss law with  $C = 19.32$  emu K  $\text{mol}^{-1}$  and  $\theta = -72.68$ .

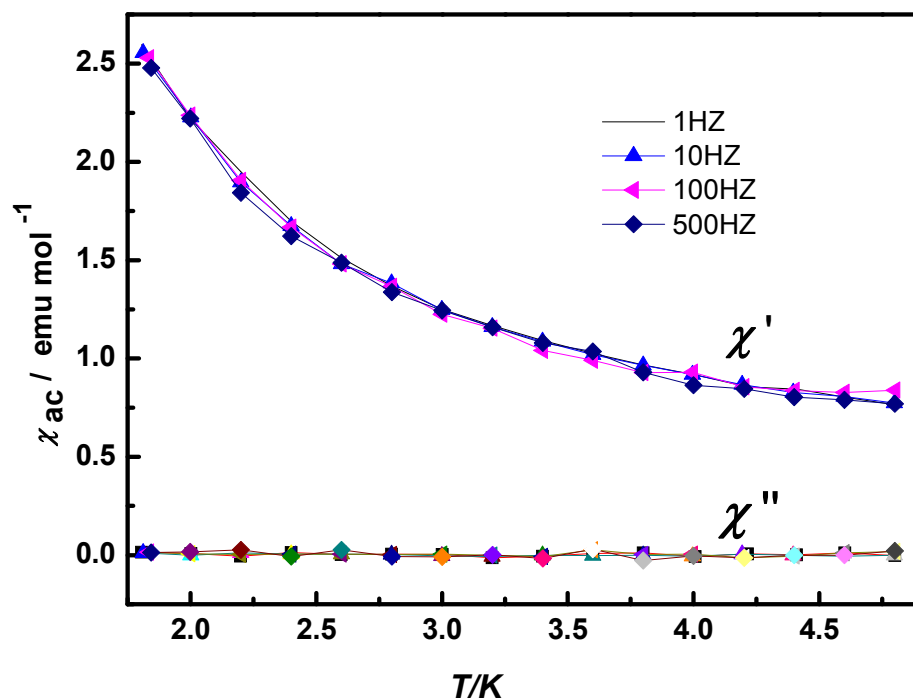

Fig. S6 Temperature dependence of ac susceptibility at various frequencies from 1.8 - 5 K. ( $H_{dc} = 0$  Oe,  $H_{ac} = 5$  Oe).

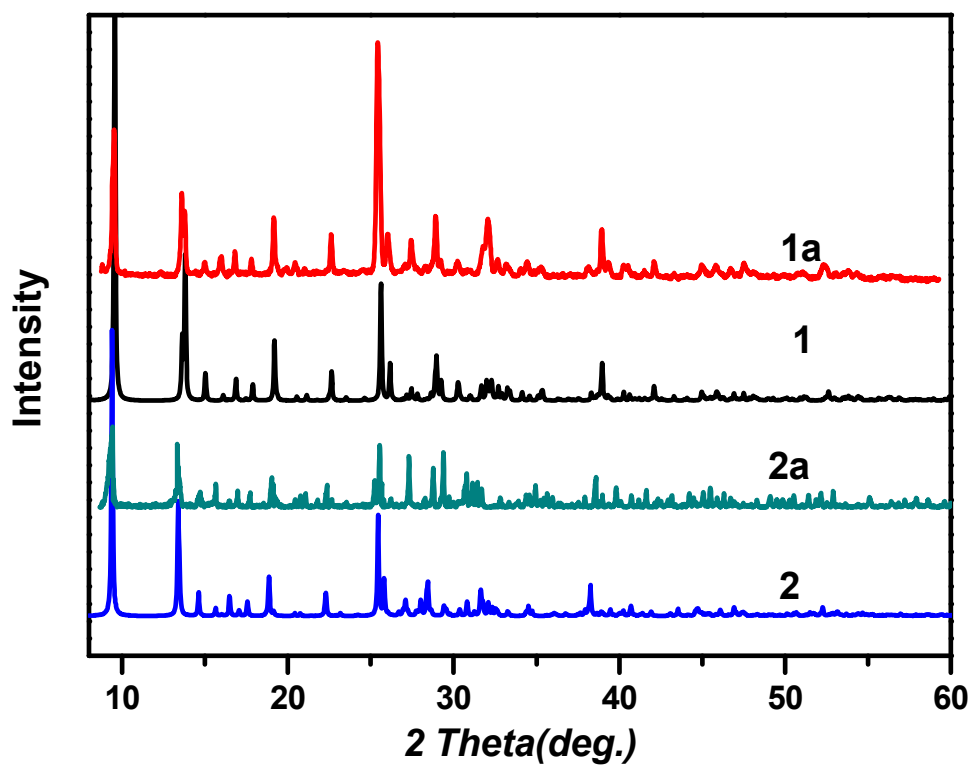

Fig. S7 Powder XRD pattern of the product obtained from the experiment (1a-2a) associated with the simulated XRD pattern from the single crystal X-ray data (1-2).

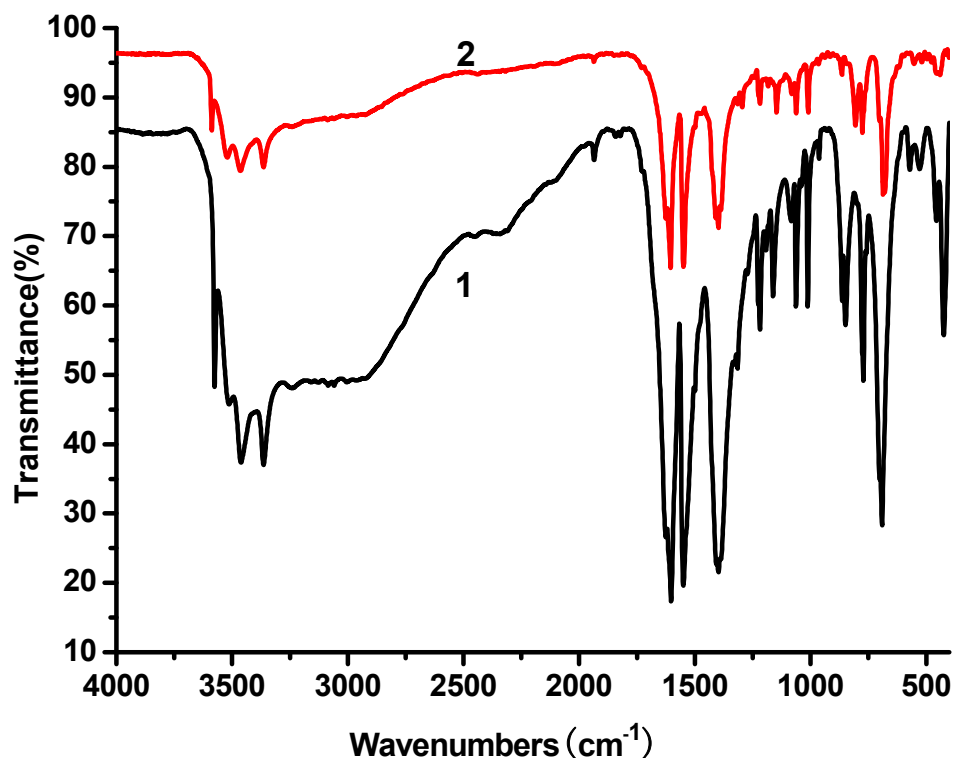

Fig. S8 Infrared spectra of compounds 1-2.

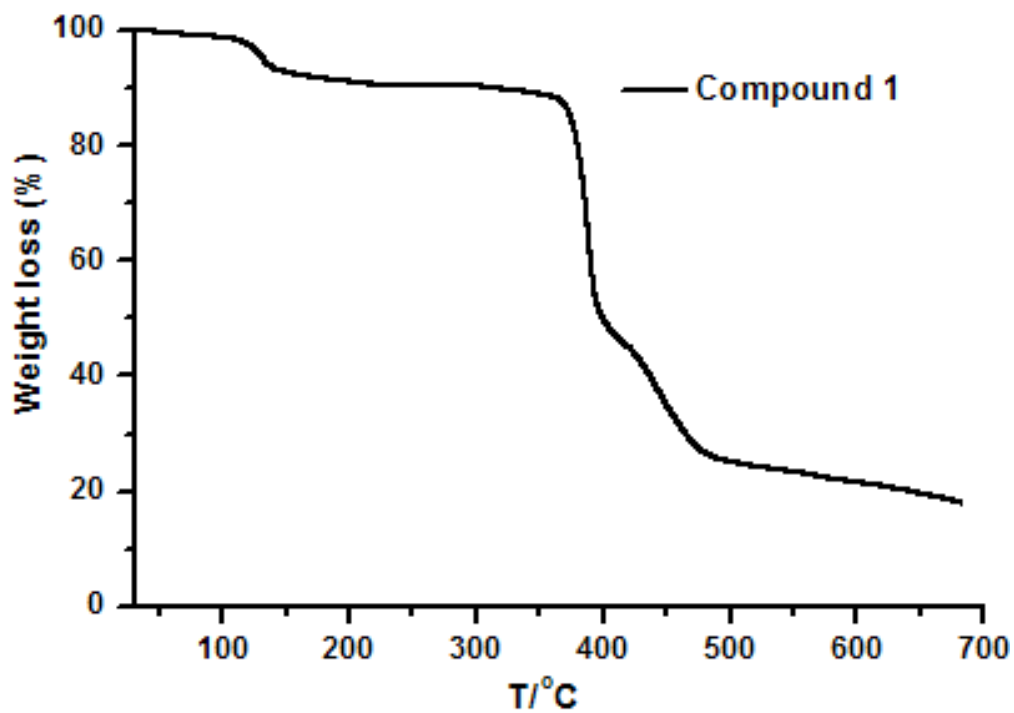

Fig. S9 TGA diagram of compound 1.

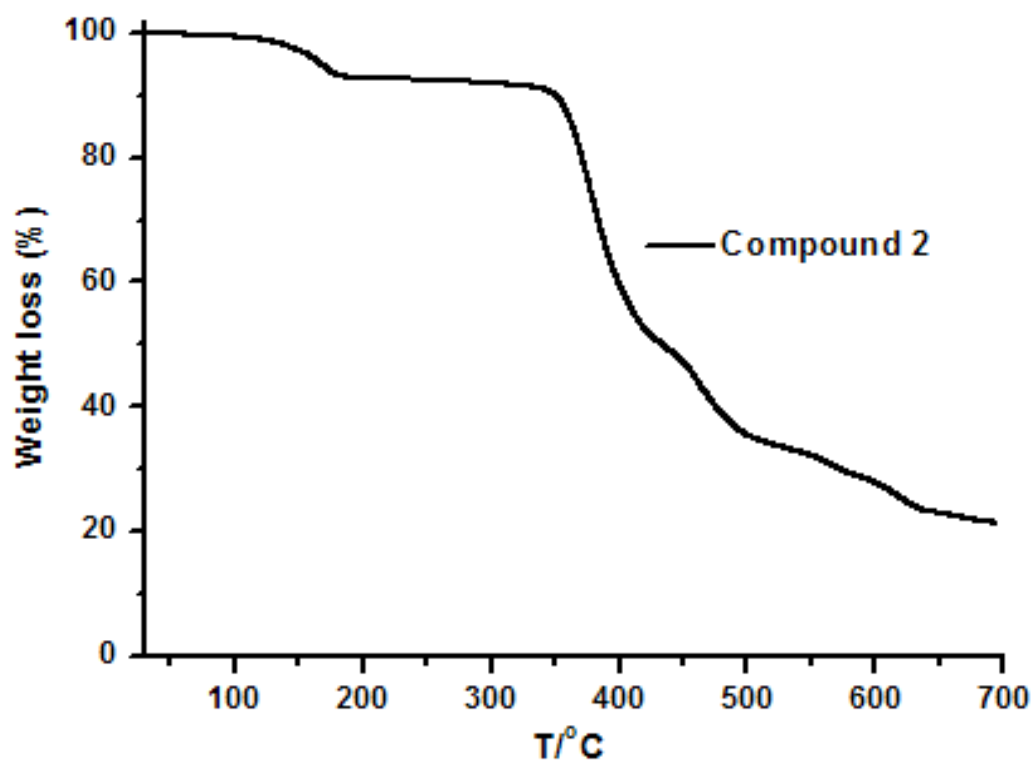

Fig. S10 TGA diagram of compound 2.

**Table S1. Bond lengths [Å] and angles [°] for 1-2.**

| <b>Complex 1<sup>a</sup></b> |            |                     |            |
|------------------------------|------------|---------------------|------------|
| Co(1)-OW1                    | 2.044(3)   | Co(1)-O(1)          | 2.116(3)   |
| Co(1)-N(3)                   | 2.200(4)   | Co(1)-N(6)#1        | 2.202(4)   |
| Co(1)-N(2)                   | 2.223(4)   | Co(1)-N(1)          | 2.247(4)   |
| Co(2)-O(1)                   | 2.068(3)   | Co(2)-O(1)#2        | 2.071(3)   |
| Co(2)-O(2)#3                 | 2.081(3)   | Co(2)-O(3)#4        | 2.090(3)   |
| Co(2)-N(5)#5                 | 2.125(4)   | Co(2)-N(4)          | 2.130(4)   |
| O(1)-Co(1)-N(6)#1            | 86.76(11)  | N(3)-Co(1)-N(6)#1   | 173.26(13) |
| N(3)-Co(1)-N(2)              | 91.11(13)  | N(6)#1-Co(1)-N(2)   | 88.45(13)  |
| N(3)-Co(1)-N(1)              | 90.37(13)  | N(6)#1-Co(1)-N(1)   | 90.52(13)  |
| N(2)-Co(1)-N(1)              | 175.97(14) | O(1)-Co(2)-O(1)#2   | 179.38(6)  |
| O(1)-Co(2)-O(2)#3            | 88.01(12)  | O(1)#2-Co(2)-O(2)#3 | 92.24(12)  |
| O(1)-Co(2)-O(3)#4            | 92.71(12)  | O(1)#2-Co(2)-O(3)#4 | 87.05(12)  |
| O(2)#3-Co(2)-O(3)#4          | 178.60(13) | N(5)#5-Co(2)-N(4)   | 179.50(13) |
| Co(2)-O(1)-Co(2)#5           | 106.05(13) | Co(2)-O(1)-Co(1)    | 120.58(13) |
| Co(2)#5-O(1)-Co(1)           | 119.69(13) | OW1-Co(1)-O(1)      | 172.15(12) |
|                              |            |                     |            |
| <b>Complex 2<sup>b</sup></b> |            |                     |            |
| Mn(1)-OW1                    | 2.121(3)   | Mn(1)-O(5)          | 2.194(3)   |
| Mn(1)-N(2)                   | 2.304(3)   | Mn(1)-N(4)#1        | 2.315(3)   |
| Mn(1)-N(7)                   | 2.316(3)   | Mn(1)-N(1)          | 2.376(3)   |
| Mn(2)-O(5)                   | 2.139(3)   | Mn(2)-O(5)#2        | 2.144(3)   |
| Mn(2)-O(2)#3                 | 2.159(3)   | Mn(2)-O(1)#4        | 2.170(3)   |
| Mn(2)-N(6)                   | 2.277(3)   | Mn(2)-N(5)#5        | 2.285(3)   |
| OW1-Mn(1)-O(5)               | 169.93(11) | N(2)-Mn(1)-N(4)#1   | 93.15(11)  |
| N(2)-Mn(1)-N(7)              | 88.34(11)  | N(4)#1-Mn(1)-N(7)   | 174.76(12) |
| N(2)-Mn(1)-N(1)              | 175.90(12) | N(4)#1-Mn(1)-N(1)   | 90.00(11)  |
| N(7)-Mn(1)-N(1)              | 88.75(11)  | O(5)-Mn(2)-O(5)#2   | 179.57(8)  |
| O(2)#3-Mn(2)-O(1)#4          | 179.43(12) | O(5)#2-Mn(2)-O(1)#4 | 92.96(11)  |
| Mn(2)-O(5)-Mn(2)#5           | 105.89(11) | N(6)-Mn(2)-N(5)#5   | 179.51(11) |
| Mn(2)#5-O(5)-Mn(1)           | 119.77(11) | Mn(2)-O(5)-Mn(1)    | 118.68(11) |

Symmetry code:

(a) #1 x,y+1,z; #2 -x+1/2,y-1/2,-z+1/2; #3 -x+3/2,y-1/2,-z+1/2; #4 x-1,y,z; #5 -x+1/2,y+1/2,-z+1/2; #6 -x+3/2,y+1/2,-z+1/2.

(b): #1 x, y-1, z; #2 -x+1/2, y+1/2, -z+1/2; #3 x-1, y, z; #4 -x+3/2, y+1/2, -z+1/2; #5 -x+1/2, y-1/2,-z+1/2.
